# Supplementary material for: Do gabapentin or pregabalin directly modulate the µ receptor?
Source: PeerJ. 2021 Apr 12;9:e11175. doi: 10.7717/peerj.11175 (PMC8048397; doi:10.7717/peerj.11175)
Supplement: Supplemental Information 1 [file peerj-09-11175-s001.xlsx]

## Sheet: FIGURE 1 
Figure 1 c
	Effect of Pregabalin on Morphine CRC in HEK-µ cells
	Concentration of Morphine	Control							100uM Pregabalin							1uM Pregabalin
	-5.5		9.11913	6.29755	10.3394	19.4354	9.11913	11.3157		10.3266	9.38788	10.1197	15.2737	10.3266			12.3454	9.26757	10.1992	15.2338	12.3454	10.447
	-6		9.11939	3.82507	7.29475	19.179	9.11939	10.232		9.5763	7.87816	7.21824	14.8955	9.5763			10.9599	12.1999	9.42783	14.8582	10.9599	8.64941
	-6.5		5.28431	0.10217	6.37533	16.0476	5.28431	6.79669		4.95691	5.35475	6.39206	12.6855	4.95691			6.77488	6.21274	6.16868	12.2245	6.77488	5.89303
	-7		3.28884	0.772732	3.89997	11.0415	3.28884	4.52243		2.29523	2.80805	4.87546	8.60935	2.29523			1.58917	5.02439	5.35604	9.08442	1.58917	3.59426
	-7.5		3.14611	-0.635602	2.62014	5.52064	3.14611	2.64268		2.79893	3.84811	1.53077	4.2178	2.79893			2.98808	3.2154	3.83407	4.74118	2.98808	1.49728
	-8		1.59874	-0.628031	1.33419	3.28662	1.59874	1.04152		2.2644	2.98277	0.0892037	2.47969	2.2644			3.01892	3.2609	0.436837	2.75905	3.01892	1.30558
	-8.5		-1.44932	-1.86271	0.622902	1.55422	-1.44932	0.342722		0.300597	3.87663	0.725075	0.5234	0.300597			2.92043	3.52681	1.05251	1.32895	2.92043	1.79448
Figure 1 e
	Effect of Gabapentin on Morphine CRC in HEK-µ cells
	Concentration of Morphine	Control						100µM Gabapentin						1µM Gabapentin
	-5.5	7.49449	5.85247	9.40218	19.4354	11.8861	7.6509	7.44655	8.26846	10.9948	17.7594	13.5274	9.32757	6.27272	10.5702	10.6852	17.9904	11.1215	7.98447
	-6	7.01387	3.55659	6.94034	19.179	9.7879	7.06858	5.92456	6.58265	7.42715	17.3986	12.4301	5.78667	5.2505	9.36955	9.59	17.4725	10.0016	6.49362
	-6.5	6.0718	0.380387	6.57105	16.0476	9.43585	4.97476	4.12581	4.11125	6.76738	15.5648	12.1223	4.65141	4.97621	6.40362	9.7932	14.1947	8.6653	3.00929
	-7	5.04614	-0.0200942	3.62243	11.0415	4.58468	4.21512	1.96859	1.65171	3.55256	10.7899	4.79981	3.18628	1.67694	3.61548	6.28707	10.4451	7.0912	2.18969
	-7.5	4.08965	-0.595159	1.3823	5.52064	3.36961	3.28903	1.01929	2.18616	2.32251	5.01134	4.39265	1.59943	1.57959	4.99931	4.19867	5.24035	2.49574	1.26838
	-8	3.24197	-1.24634	1.48284	3.28662	2.27317	1.65735		0.949683	1.61069	2.19564	3.74316	1.76454	-0.606414	2.06244	3.62232	2.92011	1.89967	-1.31014
	-8.5	4.59192	-2.26552	0.891267	1.55422	1.63466	1.52587	1.21894	1.72821	2.05728	0.782859	0.712051	0.416088	1.70964	2.3486	3.10996	2.03502	-0.563049	0.453124
Figure 1 d
	Effect of Pregabalin on Morphine CRC in AtT-µ cells
	Concentration of Morphine	Control							Pregabalin 100uM							Pregabalin 1uM
	-5.5	31.0021	29.0565	26.1333	22.01241385*	31.0505	27.5147	27.9732	31.7486	30.9573		23.60159405*	29.9506	26.2024	28.9536	31.942	31.4279	26.1599	34.9673756*	31.1818	28.5905	30.2356
	-6	31.2331	28.4468	25.5194	21.08287565*	29.5725	26.8559	26.8477	31.3955	29.4967		21.9787563*	30.6853	25.7865	28.8181	32.3134	30.9433	24.6797	34.23654445*	30.8556	28.3291	29.9919
	-6.5	29.3012	26.4478	19.6026	17.8075279*	28.82	24.0301	23.7676	29.1959	27.245		18.8335365*	29.314	22.926	26.1282	30.3157	29.5232	21.1304	29.5652081*	30.1067	25.0994	26.8573
	-7	25.7652	19.5642	10.5527	13.214757*	26.0452	17.681	17.0135	24.0089	22.0594		14.26338225*	24.847	16.1872	17.4649	24.3043	23.7883	11.1302	23.5359685*	24.9007	18.2505	17.6598
	-7.5	16.8401	13.9591	5.74055	6.02901458*	16.8749	10.5331	10.6695	14.1498	14.5926		8.002782315*	18.0906	8.29184	9.1708	13.9292	15.6443	5.05134	14.56269695*	16.6004	11.1348	10.7621
	-8	8.49647	7.09544	2.46404	1.69597977*	9.92611	5.10623	6.10935	6.28354	7.26889		2.710057025*	7.76284	2.40178	4.38231	6.94306	9.00265	1.0773	5.67280933*	5.7332	5.59941	5.08668
	-8.5	3.36205	2.22567	1.10364	0.70739162*	3.97509	1.59774	1.9285	1.73601	1.42776		5.04510098*	2.13139	1.27025	0.679308	2.25574	3.51406	0.806162	1.727845625*	2.48488	2.32234	1.2983
Figure 1 f
	Effect of Gabapentin on Morphine CRC in AtT-µ cells
	Concentration of Morphine	Control							100µM Gabapentin							1µM Gabapentin
	-5.5	27.6154	31.0021	29.0565	26.1029	22.1653	31.2456	27.6939	25.3534	31.169	30.4487	24.9996	22.3878	31.0498	25.9361	22.2305	32.4071	30.5437	22.3694	23.5527	30.7273	26.2873
	-6	24.2432	31.2331	28.4468	25.4551	21.1551	29.845	25.6086	21.7278	30.2462	30.445	23.6163	20.793	31.3396	24.5202	20.4985	31.468	27.3064	21.4319	22.7215	30.6609	25.2072
	-6.5	19.1408	29.3012	26.4478	19.5204	17.8919	29.0262	22.8515	17.5121	29.1192	23.3271	18.3938	16.7673	31.2506	19.0856	16.5586	30.1568	27.8654	15.9605	17.4642	30.6888	21.686
	-7	11.9303	25.7652	19.5642	10.4825	13.2669	26.1987	17.4765	8.72965	25.1062	19.3389	9.57079	12.2902	27.0209	15.3497	11.0424	26.0862	15.935	8.26783	10.1143	25.9074	16.1524
	-7.5	4.46926	16.8401	13.9591	5.67726	6.10419	17.0907	9.95079	6.4431	14.7615	13.4076	4.44566	5.53584	19.7014	6.54337	4.44005	16.4962	14.0941	3.97149	6.22247	19.9673	8.00354
	-8	1.95718	8.49647	7.09544	2.55707	1.74219	10.023	3.67539	-0.244519	7.46712	6.61897	2.07644	1.57959	9.56753	1.30826	-1.76155	9.40398	8.17366	0.78208	2.24407	8.54022	2.83128
	-8.5	-0.136786	3.36205	2.22567	1.15821	0.658874	4.06261	2.08431	1.29694	1.56149	2.88584	1.04981	1.02912	3.88963	0.0314217	-0.489122	3.68535	2.85174	0.81997	-0.153976	3.92692	0.236975

## Sheet: Figure 2
Figure 2 c.
	Effect of gabapentinoids in morphine induced desensitization in HEK µ cells
		Control	Gabapentin	Pregabalin
	Test 1	23228	23098	24249
	Test 2	18451	17301	17021
	Test 3	12526	12737	12327
	Test 4	25936	23698	23847
	Test 5	20010	17554	20819
	Test 6 *	11968*	12007*	11198*
Figure 2 d
	Effect of gabapentinoids in morphine induced desensitization in AtT20 µ cells
		Control	Gabapentin	Pregabalin
	Test 1	20374	22676	22913
	Test 2	13023	12461	11517
	Test 3	13515	13515	13821
	Test 4	22895	21791	22371
	Test 5	17975	28240	24894
	TEST 6	19046	17366	16166

## Sheet: Figure 3 
	Effect of prolonged incubation of pregabalin or gabapentin (60 minutes) on Morphine CRC in HEK µ cells
	Concentration of Morphine	control						100mM Pregabalin						100mM Gabapentin
	-5.5	12.574	15.0286	11.6162	17.7971	11.1564	13.2636	13.7934	11.7289	11.2918	17.6088	11.2456	10.2112	12.6277	14.6666	11.8333	18.8926	11.4721	10.6672
	-6	11.2783	13.9106	10.2578	17.4901	9.9716	10.4794	13.0016	9.299	10.2706	17.2769	9.3066	8.6279	13.9947	11.8627	11.4523	16.8823	9.8386	9.2261
	-6.5	11.7091	11.464	7.5404	13.2004	7.5892	6.1239	11.1129	6.7926	7.9256	13.183	6.7705	7.3104	11.0243	8.6366	7.7983	14.5316	8.0423	6.4599
	-7	7.0753	5.091	5.3838	10.3016	4.6425	4.9915	8.2344	2.8827	5.1801	8.7863	6.3201	7.1299	8.6774	4.7492	5.1595	10.5584	3.7868	4.3229
	-7.5	4.2615	2.8335	1.8786	5.4661	2.6438	2.1108	3.6499	1.3821	2.8566	3.9304	3.9073	5.1162	6.664	2.616	3.1857	6.0316	1.7439	2.6997
	-8	1.9197	1.7046	2.1589	4.8712	0.7227	-0.576	2.5755	2.8744	2.2776	2.1951	2.3976	1.3266	3.2916	2.3656	1.9953	5.6657	0.612	0.9233
	-8.5	1.2775	5.7467	0.9518	2.1209	0.7682	0.8853	2.237	-0.1643	1.8617	1.6736	2.3422	1.7145	1.8431	2.4707	1.9536	1.1732	1.6076	0.1584

## Sheet: Figure 4
	CAMYEL DATA
Figure 4 c
	Effect of Pregabalin on Morphine induced inhibition of forskolin mediated increase in cAMP
	Concentration of Morphine	Control									1mM Pregabalin
	-5.5		37.46	29.79	27.19	40.13	49.02	45.69				38.77		42.2	38.25	31.7	19.07
	-6	39.58	48.46	33.91	31.07	41.65	48.7	43.41	30.34	44.17	58.64	36.38	28.76	32.05	41.66	29.61	34.11	33.05	31.21
	-6.5	37.27	31.85	46.1	25.29	33.17	43.78	35.39	41.96	39.34	52.97	31.99	19.08	29.56	28.91	36.55	29.75	41.49	36.29
	-7	29.32	29.93	26.03	9.17	18.23	32.24	33.04	23.34	37.43	32.84	23.59	38.34	27.76	21.81	24.87	13.66	34.76	26.99
	-7.5	24.85	22.58	12.39	-1.56	7.27	16.58	21.7	16.75	26.85	21.57	7.75	17.12	14.64	15.71	4.34	6.92	24.34	13.24
	-8	-1.01	18.28	12.94	-9.17	13.37	20.66	9.98	13.03	25.75	38.15	1.76	-4.97	5.44	23.39	10.38	-5.06	9.96	13.49
	-8.5	-19.41							9.95	-12.22	-2.47							-16.27	-0.93
Figure 4 a and b
	Effect of Gabapentin on Morphine induced inhibition of forskolin mediated increase in cAMP
	Concentration of Morphine	Control										1mM Gabapentin							100mM Gabapentin
	-5.5		37.46	29.79	27.19	40.13	49.02	45.69	30.34				27.14	40.05	52.97	50.36				21.17	41.38	25.82		35.17
	-6	39.58	48.46	33.91	31.07	41.65	48.7	43.41	41.96	44.17		25.41	36.64	42.14	44.38	49.94	46.7	47.47	40.19	26.11	35.96	40.5	55.84	35.42
	-6.5	37.27	31.85	46.1	25.29	33.17	43.78	35.39	23.34	39.34		47.85	38.97	20.45	44.27	40.22	39.24	35.66	31.57	16.15	32.11	15.1	42.87	34.19
	-7	29.32	29.93	26.03	9.17	18.23	32.24	33.04	16.75	37.43		26.59	20.14	29.68	35.02	30.98	33.23	22.17	29.7	18.29	27.17	20.28	32.96	26.11
	-7.5	24.85	22.58	12.39	-1.56	7.27	16.58	21.7	13.03	26.85		16.66	14.08	22.24	16.69	12.98	28.41	21.09	7.15	31.71*	20.84	15.59	39.54	15.59
	-8	-1.01	18.28	12.94	-9.17	13.37	20.66	9.98	9.95	25.75		20.87	6.73	24.23	19.45	18.06	20.07	31.09*	2.93	3.61	20	10.28	14.32	13.13
	-8.5	-19.41								-12.22		0.11					-3.07	5.55	-16.73				7.16
figure 4 f
	Effect of Pregabalin on Forskolin CRC
	Concentration of Forskolin	100mM Pregabalin							Vehicle
	-4.5		87.93			147.8	109.29		71.71			98.34	125.5
	-5	83.72	90.23	113.47	109.3	125.7	100.59	36.4	69.21	68.67	74.12	70.57	97.3
	-5.5	67.52	35.48	75.61	55.74	73.79	62.59	9.4	3.75	39.27	38.81	35.35	60.12
	-6	33.21	37.37	50.59	42.15	54.27	48.95	-1.95	13.7	21.27	29.56	25.26	37.83
	-6.5	15.6	24.99	24.83	8.28	8.09	12.81	-9.54	-8.69	4.1	6.65	-0.93	2.77
	-7	3.06	10.3	8.7	0.97	-1.72	3.38	-26.33	-4.27	-7.85	-3.89	0.79	5.95
	-8	-7.49		3.54	-2.29			-17.04		3.44	8.11
Figure 4 e
	Effect of Pregabalin on isoproterenol CRC
	Concentration of Isoproterenol	100mM Pregabalin					Vehicle
	-5	128.59	98.35	176.99	118.09	84.81	116.71	115.5	146.49	146.67	135.1
	-6	127.59	131.45	132.09	201.99	131.31	126.21	129.7	131.99	135.47	158.9
	-7	118.99	117.85	127.39	105.09	140.11	111.81	122.6	127.99	129.97	134.6
	-8	82.79	80.85	85.09	68.64	91.11	62.91	75.4	73.29	89.07	100.5
	-9	16.21	24.74	24.88	34.07	37.99	8.16	21.13	15.06	27.16	23.32
	-10	1.35	5.75				-11.55	0.83
	unpaired Students T test for EC50 of Pregabalin on forskolin crc
	100mM Pregabalin	Control
	5.6	4.9
	5.8	5.3
	5.4	5.4
	5.5	5.2
	5.7	5.4

## Sheet: Figure 5
	ERK PHOSPHORYLATION BY ELISA
Figure 5 b
	Concentration of Morphine	Control												100mM Gabapentin						1mM Gabapentin
	-5.5	41.3922		19.44	40.0875	47.0372	19.5967		32.2416	22.6917	38.9989	14.0034	12.9508	37.6497	10.3681	21.87	51.2557	30.3094		25.3742	10.7501	34.3607	47.9811	17.7554
	-6	42.4401		23.2964	45.5479	49.4494	22.6217		28.4207	19.3532	27.4397	15.4752	15.9344	27.2081	11.1043	23.8774	53.5008	35.6057		17.2156	13.7612	39.1172	45.7263	12.8014
	-6.5	29.2665		20.1796	36.0731	38.28	17.7992	28.3414	24.3086	22.9004	22.2542	13.4567	12.918	19.4611	8.89571	21.5003	48.9346	28.6314		9.15045	11.701	33.6758	35.9727	13.3713
	-7	15.8308		12.0972	25.3805	25.0656	7.40903	5.04131	16.1936	16.6927	15.9885	12.111	2.03279	2.13323	1.63599	10.5652	22.7169	13.4767		4.54716	7.97676	13.8128	22.968	8.242
	-7.5	1.45958		9.93133	13.3562	20.9753	5.61157	-4.53294	5.02183	7.04225	10.0108	8.66274	-0.393443	-6.3997	-4.49898	10.8822	11.3394	4.5097		-8.86976	1.55837	4.64231	14.2108	2.67427
	-8	-8.30838		4.96566	9.43683	12.6377	5.9623	-2.41474	0.473071	6.31195	14.8181	4.07906	1.14754	-10.0674	-10.0204	5.75806	9.09437	6.29261		-10.8159	0.924459	-0.342466	10.0682	2.58658
Figure 5 a
	Concentration of Morphine	100mM Pregabalin							1mM Pregabalin							Control
	-4.5		23.1077	28.2212	44.9046	8.95711	8.98361			15.9753	23.2133	48.1455	15.2229	12.1311			32.2416	22.6917	38.9989	14.0034	12.9508
	-5		21.1063	28.4298	35.578	7.06476	9.2459			12.8093	14.2932	44.0403	11.8587	9.14754			28.4207	19.3532	27.4397	15.4752	15.9344
	-6	23.7238	13.9374	25.7173	23.6226	4.54163	5.68853		24.91	11.2809	16.1189	33.5614	11.6484	6.81967		28.3414	24.3086	22.9004	22.2542	13.4567	12.918
	-7	1.77928	8.58806	19.7444	14.5481	-1.9344	1.80328		3.17729	-0.40029	0.208659	23.8387	8.03196	2.78688		5.04131	16.1936	16.6927	15.9885	12.111	2.03279
	-7.5	-10.6969	-1.12809	11.6328	13.8639	-1.09336	-0.16393		-4.74476	-10.5531	-0.20866	21.6241	1.26156	0.459016		-4.53294	5.02183	7.04225	10.0108	8.66274	-0.393443
	-8	-14.0648	-1.78311	6.46844	5.22146	1.51388	-0.59016		-5.84622	-1.81951	-1.09546	15.6644	1.51388	-0.39344		-2.41474	0.473071	6.31195	14.8181	4.07906	1.14754
