# Supplementary material for: Do gabapentin or pregabalin directly modulate the µ receptor?
Source: PeerJ. 2021 Apr 12;9:e11175. doi: 10.7717/peerj.11175 (PMC8048397; doi:10.7717/peerj.11175)
Supplement: Supplemental Information 2 [file peerj-09-11175-s002.xlsx]

## Sheet: TABLE 1
Emax and EC50 obtained for Morphine with Gabapentin or vehicle in AtT20 µ cells										Emax and EC50 obtained for Morphine with PREGABALIN or vehicle in AtT20 µ cells
		Emax				EC50						Emax				EC50
		Control	GP 100uM	GP 1uM		Control	GP 100uM	GP 1uM				Control	GP 100uM	GP 1uM		Control	GP 100uM	GP 1uM
		28.61	27.13	21.92		-6.818	-6.732	-6.965				31.56	32.08	32.92		-7.59	-7.429	-7.422
		31.56	31.16	32.76		-7.59	-7.51	-7.568				29.97	30.92	32.29		-7.401	-7.439	-7.513
		29.97	32.83	32.47		-7.401	-7.21	-7.238				28.28		26.8		-6.843		-6.922
		28.29	26.55	23.71		-6.838	-6.813	-6.789				22.2	24.64	35.53		-7.122	-7.134	-7.307
		22.34	22.91	25.4		-7.122	-7.013	-6.873				30.98	30.41	31.33		-7.648	-7.625	-7.529
		31.21	31.72	31.09		-7.651	-7.701	-7.693				28.45	26.77	30		-7.262	-7.182	-7.256
		27.93	26.01	26.53		-7.223	-7.064	-7.164				29.42	30.1	31.8		-7.215	-7.179	-7.18
Emax and EC50 obtained for Morphine with Gabapentin or vehicle in HEK µ cells										Emax and EC50 obtained for Morphine with Pregabalin or vehicle in HEK µ cells
		Emax				EC50						Emax				EC50
		Control	GP 100uM	GP 1uM		Control	GP 100uM	GP 1uM				Control	GP 100uM	GP 1uM		Control	GP 100uM	GP 1uM
			10.43	6.408			-6.154	-6.793				6.073	7.091	6.334		-8.521	-6.143	-6.309
		6.039	51.85	37.31		-6.058	-3.535	-4.152				10.97	17.09	~ 119.3		-6.62	-5.936	~ -2.702
		11.08	54.94	13.02		-6.546	-3.673	-7.087				6.352	~ 16176	17.04		-6.048	~ 10.84	-6.151
		20.76	18.23	19.38		-7.079	-7.157	-7.06				15.19	10.49	11.81		-6.09	-6.722	-6.774
		10.6	~ 203.1	9.737		-6.544	~ -1.624	-6.254				20.76	16.03	16.26		-7.079	-7.086	-7.108
		14.19	15.45	10.87		-6.707	-6.908	-7.154				10.97	17.09	~ 119.3		-6.62	-5.936	~ -2.702
												13.28		15.42		-6.604		-6.119
